# Supplementary material
Source: publisher site journal article supplement (https://www.dovepress.com/article/404243)
Supplement: Supplementary file 1 [file get_supplementary_file.php]

**Supplementary Table 1: TRONARTO trial sites and ethics committee information**

|  | **Site name** | **Location** | **Ethics committee name** | **Study site number / investigator** | **Date of final approval** |
| --- | --- | --- | --- | --- | --- |
| 1 | SEC Lung | Andalusia, Alabama, United States, 36420 | Advarra, Inc., 6940 Columbia Gateway Drive, Suite 110, Columbia, Maryland 21046, United States | USA4 - Dr. Robert Garver | 19-Dec-2019  06-Jan-2020  04-Feb-2020 |
| 2 | Jasper Summit Research, LLC | Jasper, Alabama, United States, 35501 | Advarra, Inc., 6940 Columbia Gateway Drive, Suite 110, Columbia, Maryland 21046, United States | USA19 - Dr. Jan Westerman | 03-Dec-2019  06-Jan-2020  04-Feb-2020 |
| 3 | Meris Clinical Research | Brandon, Florida, United States, 33511 | Advarra, Inc., 6940 Columbia Gateway Drive, Suite 110, Columbia, Maryland 21046, United States | USA24 - Dr. Dragos Zanchi | 03-Dec-2019  06-Jan-2020  04-Feb-2020 |
| 4 | Clinical Research of West Florida, Inc. | Clearwater, Florida, United States, 33765 | Advarra, Inc., 6940 Columbia Gateway Drive, Suite 110, Columbia, Maryland 21046, United States | USA1 - Dr. Leonard Dunn | 03-Dec-2019  06-Jan-2020  04-Feb-2020 |
| 5 | Clinical Research Specialists LLC | Kissimmee, Florida, United States, 34746 | Advarra, Inc., 6940 Columbia Gateway Drive, Suite 110, Columbia, Maryland 21046, United States | USA14 - Dr. Thomas O'Brien | 15-Jan-2020  15-Jan-2020  04-Feb-2020 |
| 6 | Clinical Research of West Florida, Inc. | Tampa, Florida, United States, 33606 | Advarra, Inc., 6940 Columbia Gateway Drive, Suite 110, Columbia, Maryland 21046, United States | USA2 - Dr. Lon Lynn | 02-Dec-2019  06-Jan-2020  04-Feb-2020 |
| 7 | Best Clinical Trials, LLC | New Orleans, Louisiana, United States, 70115 | Advarra, Inc., 6940 Columbia Gateway Drive, Suite 110, Columbia, Maryland 21046, United States | USA3 – Dr. George Walker48 | 30-Jan-2020  30-Jan-2020  04-Feb-2020 |
| 8 | Infinity Medical Research | North Dartmouth, Massachusetts, United States, 02747 | Advarra, Inc., 6940 Columbia Gateway Drive, Suite 110, Columbia, Maryland 21046, United States | USA36 - Dr. Curtis Mello | 27-Feb-2020  27-Feb-2020  27-Feb-2020 |
| 9 | Pulmonary Research Institute of Southeast Michigan | Farmington Hills, Michigan, United States, 48152 | Advarra, Inc., 6940 Columbia Gateway Drive, Suite 110, Columbia, Maryland 21046, United States | USA12 - Dr. Gary Ferguson | 23-Jan-2020  23-Jan-2020  04-Feb-2020 |
| 10 | Minnesota Lung Center and Sleep Institute | Edina, Minnesota, United States, 55435 | Advarra, Inc., 6940 Columbia Gateway Drive, Suite 110, Columbia, Maryland 21046, United States | USA18 - Dr. Kevin Grullon | 09-Jan-2020  09-Jan-2020  04-Feb-2020 |
| 11 | Minnesota Lung Center | Woodbury, Minnesota, United States, 55125 | Advarra, Inc., 6940 Columbia Gateway Drive, Suite 110, Columbia, Maryland 21046, United States | USA8 - Dr. Patrick Wright | 20-Dec-2019  06-Jan-2020  04-Feb-2020 |
| 12 | Valley Regional Hospital | Claremont, New Hampshire, United States, 03743 | Advarra, Inc., 6940 Columbia Gateway Drive, Suite 110, Columbia, Maryland 21046, United States | USA16 - Dr. Donald Mahler | 16-Dec-2019  06-Jan-2020  04-Feb-2020 |
| 13 | CHEAR Center LLC | Bronx, New York, United States, 10455 | Advarra, Inc., 6940 Columbia Gateway Drive, Suite 110, Columbia, Maryland 21046, United States | USA39 - Dr. Elie Donath | 09-Jan-2020  09-Jan-2020  04-Feb-2020 |
| 14 | North Carolina Clinical Research | Raleigh, North Carolina, United States, 27607 | Advarra, Inc., 6940 Columbia Gateway Drive, Suite 110, Columbia, Maryland 21046, United States | USA20 - Dr. Craig LaForce | 19-Dec-2019  06-Jan-2020  04-Feb-2020 |
| 15 | Southeastern Research Center | Winston-Salem, North Carolina, United States, 27103 | Advarra, Inc., 6940 Columbia Gateway Drive, Suite 110, Columbia, Maryland 21046, United States | USA41 - Dr. Barry Sigal | 10-Jan-2020  10-Jan-2020  04-Feb-2020 |
| 16 | Bernstein Clinical Research Center | Cincinnati, Ohio, United States, 45231 | Advarra, Inc., 6940 Columbia Gateway Drive, Suite 110, Columbia, Maryland 21046, United States | USA21 - Dr. Jonathan Bernstein | 19-Feb-2020  19-Feb-2020  19-Feb-2020 |
| 17 | Lowcountry Lung and Critical Care | Charleston, South Carolina, United States, 29406 | Advarra, Inc., 6940 Columbia Gateway Drive, Suite 110, Columbia, Maryland 21046, United States | USA6 - Dr. Thomas Kaelin | 02-Jan-2020  06-Jan-2020  04-Feb-2020 |
| 18 | Carolina Medical Research | Clinton, South Carolina, United States, 29325 | Advarra, Inc., 6940 Columbia Gateway Drive, Suite 110, Columbia, Maryland 21046, United States | USA17 - Dr. Nancy Patel | 27-Jan-2020  27-Jan-2020  04-Feb-2020 |
| 19 | VitaLink Research -Gaffney | Gaffney, South Carolina, United States, 29340 | Advarra, Inc., 6940 Columbia Gateway Drive, Suite 110, Columbia, Maryland 21046, United States | USA5 - Dr. David Erb | 09-Dec-2019  06-Jan-2020  04-Feb-2020 |
| 20 | Vitalink Research - Spartansburg | Spartanburg, South Carolina, United States, 29303 | Advarra, Inc., 6940 Columbia Gateway Drive, Suite 110, Columbia, Maryland 21046, United States | USA13 - Dr. Gregory Feldman | 11-Dec-2019  06-Jan-2020  04-Feb-2020 |
| 21 | Diagnostics Research Group | San Antonio, Texas, United States, 78229 | Advarra, Inc., 6940 Columbia Gateway Drive, Suite 110, Columbia, Maryland 21046, United States | USA22 - Dr. Charles Andrews | 11-Dec-2019  06-Jan-2020  04-Feb-2020 |
| 22 | Klinische Forschung Berlin GbR | Berlin, Germany, 10787 | **Ethik-Kommission der Landesärztekammer Hessen, Hanauer Landstr. 152, Frankfurt 60314, Germany** | DEU2 - Dr. Isabelle Schenkenberger | 23-Dec-2019  24-Feb-2020 |
| 23 | IKF Pneumologie GmbH & Co. KG | Frankfurt, Germany, 60596 | **Ethik-Kommission der Landesärztekammer Hessen, Hanauer Landstr. 152, Frankfurt 60314, Germany** | DEU1 - Dr. Marc Oliver Kornmann | 23-Dec-2019  24-Feb-2020 |
| 24 | Pneumologisches Forschungsinstitut an der LungenClinic Grosshansdorf GmbH | Grosshansdorf, Germany, 22927 | **Ethik-Kommission der Landesärztekammer Hessen, Hanauer Landstr. 152, Frankfurt 60314, Germany** | DEU3 - Dr. Henrik Watz | 23-Dec-2019  24-Feb-2020 |
| 25 | Hamburger Institut für Therapieforschung GmbH (HIT) | Hamburg, Germany, 20354 | **Ethik-Kommission der Landesärztekammer Hessen, Hanauer Landstr. 152, Frankfurt 60314, Germany** | DEU5 - Dr. Margret Jandl | 23-Dec-2019  24-Feb-2020 |
| 26 | KLB Gesundheitsforschung Lübeck GmbH | Lübeck, Germany, 23552 | **Ethik-Kommission der Landesärztekammer Hessen, Hanauer Landstr. 152, Frankfurt 60314, Germany** | DEU4 - Dr. Andrea Ludwig-Sengpiel | 23-Dec-2019  24-Feb-2020 |
